# Supplementary material for: Messenger RNAs Mobile in Salix Matsudana Grafts Were in Association With Plant Rooting
Source: Research Square preprint supplement (doi:10.21203/rs.3.rs-556961/v1), 2021-06-16
Supplement: Supplementary file 1 [file ef5d3789e7bec35835a41eec.doc]

**Supplementary Figure legends**

S1Fig. GO annotation of DEGs in the grafted willows of 9901/YJ comparing with YJ/YJ

S2Fig. The mobile genes (in gray) involved in plant hormone signal transduction pathway

S3Fig. Expression tests of the mobile mRNAs (B29, ARR5, ERF9, ABF) with UBQ as the reference in rootstock of the grafted plants.


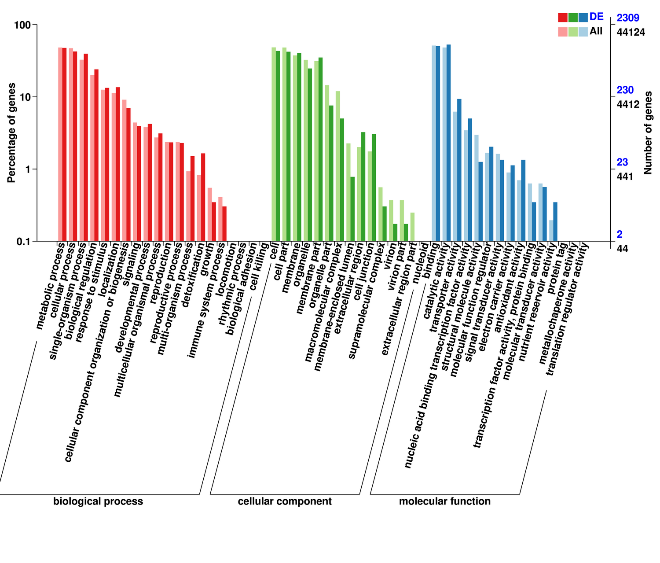


S1Fig. GO annotation of DEGs in the grafted willows of 9901/YJ comparing with YJ/YJ


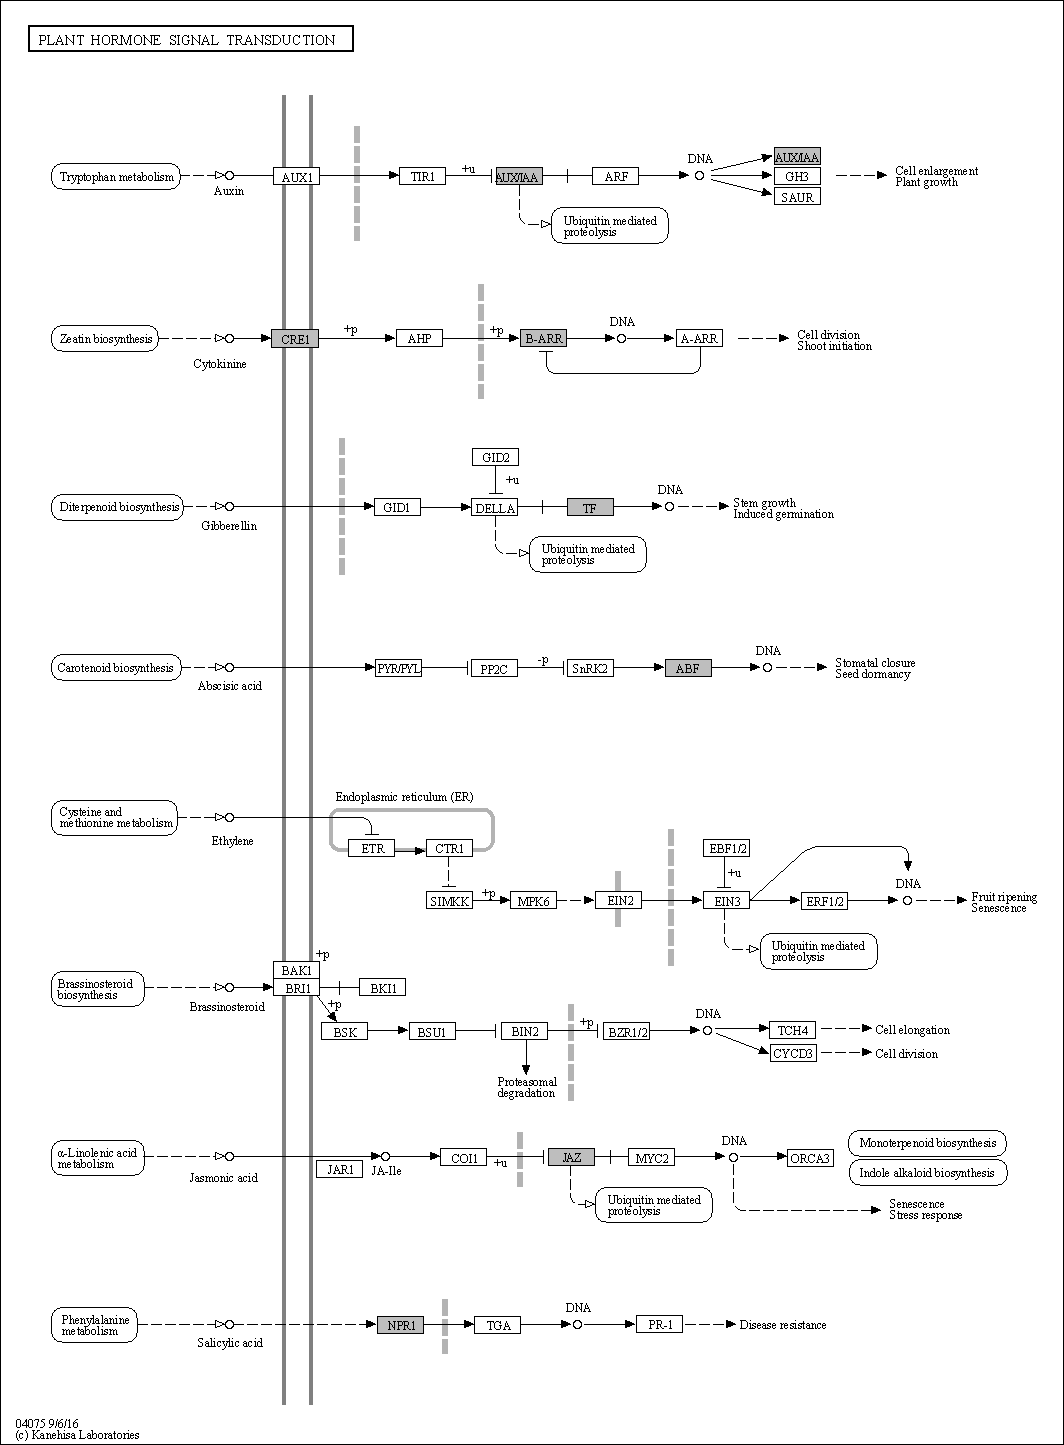


S2Fig. The mobile genes (in gray) involved in plant hormone signal transduction pathway


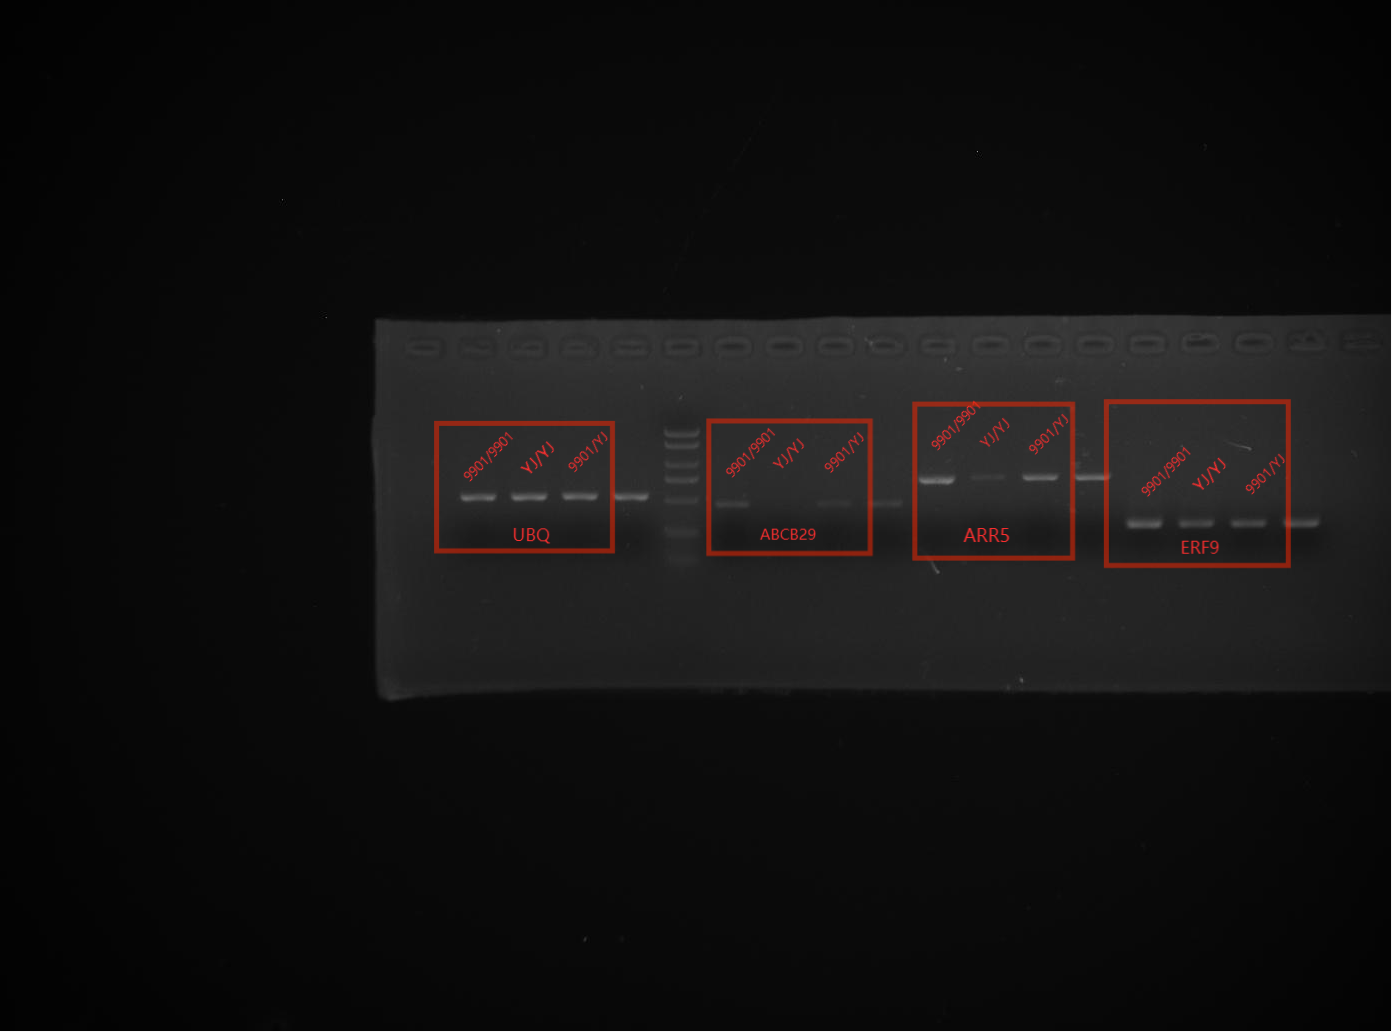

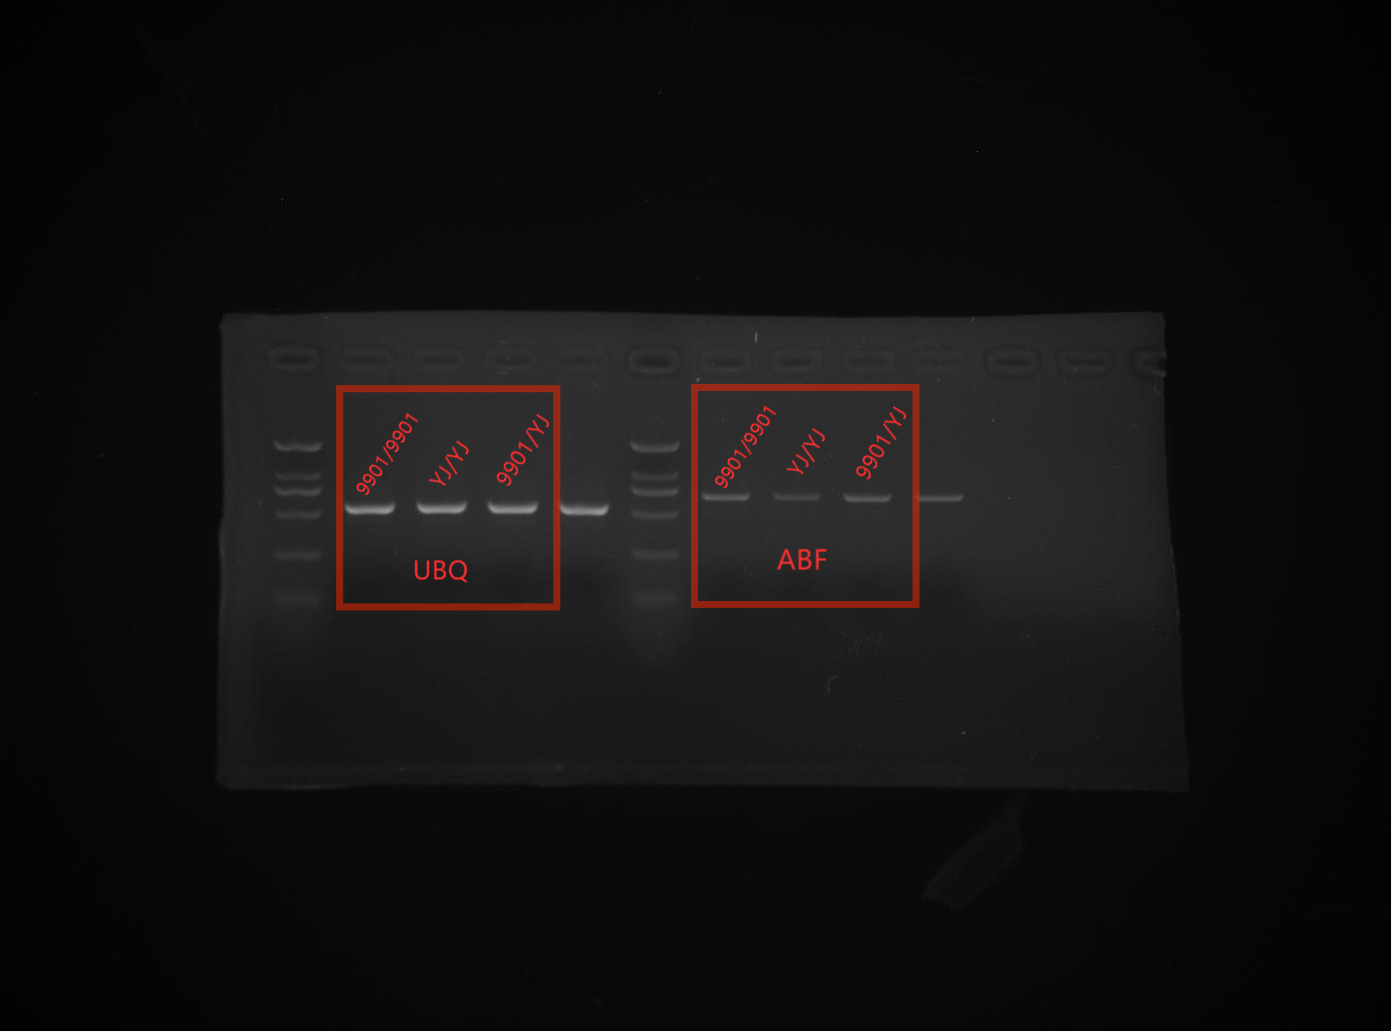


S3Fig. Expression tests of the mobile mRNAs (B29, ARR5, ERF9, ABF) with UBQ as the reference in rootstock of the grafted plants.
